# Supplementary material
Source: publisher figshare collection journal article supplement (https://acs.figshare.com/ndownloader/files/30473019)
Supplement: Supplementary file 1 [file 30473019]

## *Supporting Information*

### **Distinct Behaviors of Cu- and Ni-ZSM-5 Zeolites Toward the Post-Activation Reactions of Methane**

Muhammad Haris Mahyuddin,<sup>\*,a,b</sup> Seiya Tanaka,<sup>c</sup> Ryotaro Kitagawa,<sup>c</sup> Arifin Luthfi Maulana,<sup>a</sup> Adhitya Gandaryus Saputro,<sup>a,b</sup> Mohammad Kemal Agusta,<sup>a,b</sup> Hadi Teguh Yulistira,<sup>d</sup> Hermawan Kresno Dipojono,<sup>a,b</sup> and Kazunari Yoshizawa<sup>\*,e</sup>

<sup>a</sup> Research Group of Advanced Functional Materials, Faculty of Industrial Technology, Institut Teknologi Bandung, Bandung 40132, Indonesia

<sup>b</sup> Research Center for Nanoscience and Nanotechnology, Institut Teknologi Bandung, Bandung 40132, Indonesia

<sup>c</sup> Department of Chemistry and Biochemistry, Graduate School of Engineering, Kyushu University, Fukuoka 819-0395, Japan

<sup>d</sup> Mechanical Engineering Study Program, Institut Teknologi Sumatera, South Lampung 35365, Indonesia

<sup>e</sup> Institute for Materials Chemistry and Engineering and IRCCS, Kyushu University, Fukuoka 819-0395, Japan

\* To whom all correspondences should be addressed

(e-mail: haris[at]tf.itb.ac.id and kazunari[at]ms.ifoc.kyushu-u.ac.jp).

## Table of Contents:

|                   |                                                                                                                                                                                                    |
|-------------------|----------------------------------------------------------------------------------------------------------------------------------------------------------------------------------------------------|
| <b>Section S1</b> | Comparison of energy diagrams calculated by using different $U_{\text{eff}}$ values for the Ni 3d orbital.                                                                                         |
| <b>Figure S1.</b> | Energy diagrams of $\text{CH}_3\text{OH}$ oxidation to $\text{CH}_2\text{O}$ via the C–H pathway over $[\text{Ni–O–Ni}]^{2+}$ active site calculated by using $U_{\text{eff}} = 4.0$ and $6.4$ eV. |
| <b>Scheme S1.</b> | Possible configurations of the outermost electrons in $\text{Ni}^+$ , $\text{Ni}^{2+}$ , and $\text{Ni}^{3+}$                                                                                      |
| <b>Table S1.</b>  | Ni atomic spin densities along the $\text{CH}_3\text{OH}$ oxidation to $\text{CH}_2\text{O}$ via the C–H pathway calculated by using $U_{\text{eff}} = 4.0$ and $6.4$ eV.                          |
| <b>Section S2</b> | Details of the mathematical model derivation for calculating Arrhenius plot.                                                                                                                       |
| <b>Table S2</b>   | Geometrical parameters along the hydrolysis reaction of $\text{CH}_3$ to $\text{CH}_3\text{OH}$ over reduced Cu-ZSM-5.                                                                             |
| <b>Table S3</b>   | Geometrical parameters along the $\text{CH}_3$ oxidation to $\text{C}_2\text{H}_6\text{O}$ over reduced Cu-ZSM-5.                                                                                  |
| <b>Table S4</b>   | Geometrical parameters and atomic spin densities along the C–H pathway of $\text{CH}_3\text{OH}$ oxidation to $\text{CH}_2\text{O}$ over reduced Cu- and Ni-ZSM-5.                                 |
| <b>Table S5</b>   | Geometrical parameters and atomic spin densities along the $(\text{O–H})_a$ pathway of $\text{CH}_3\text{OH}$ oxidation to $\text{CH}_2\text{O}$ over reduced Cu- and Ni-ZSM-5.                    |
| <b>Figure S2</b>  | PDOS of TS-5 in the $\text{CH}_3$ oxidation to $\text{C}_2\text{H}_6\text{O}$ over partially reduced Cu-ZSM-5.                                                                                     |
| <b>Figure S3</b>  | Energy diagrams of $\text{CH}_3\text{OH}$ oxidation to $\text{CH}_2\text{O}$ via the $(\text{O–H})_b$ pathway on reduced Cu- and Ni-ZSM-5.                                                         |
| <b>Figure S4</b>  | Simulated Arrhenius plots for the rate-determining $\text{H–CH}_3$ , $\text{O}_F\text{–CH}_3$ , $\text{H–CH}_2\text{OH}$ , and $\text{CH}_3\text{O–H}$ activation steps.                           |

**Section S1.** Comparison of energy diagrams calculated by using different  $U_{\text{eff}}$  values for the Ni 3d orbitals

We show below (Figure S1) a comparison of energy diagrams calculated by using  $U = 4.0$  and  $6.4$  eV for the C–H pathway of the  $\text{CH}_3\text{OH}$  oxidation to  $\text{CH}_2\text{O}$  over the reduced  $[\text{Ni}_2\text{O}(\mu\text{-O})]^{2+}$  active site. As can be seen from these two energy diagrams, the used of  $U = 4.0$  and  $6.4$  eV results in comparable  $\text{CH}_3\text{OH}$  adsorption energies and the same ground spin state (open-shell singlet state) for the  $[\text{Ni}_2\text{O}]^{2+}\text{-MFI} + \text{CH}_3\text{OH}$  and **RC-1** states. However, a discrepancy in the relative energy occurs when the reaction proceeds to **TS-1** and **IC-1**, where the ground state starts changing to the triplet state. Focusing on **IC-1**, we understand that the triplet ground state can be formed either by two  $\text{Ni}^{3+}$  or two  $\text{Ni}^+$  or a pair of  $\text{Ni}^{3+}$  and  $\text{Ni}^+$  because only these two Ni oxidation states may have one unpaired electron configuration (see also Scheme S1 below). Since we found in the Cu case (Figure 3a of the revised manuscript) that **IC-1** involves a pair of  $\text{Cu}^{3+}$  and  $\text{Cu}^+$ , we expect the same also occurs for the Ni case. Thus, to treat correctly the correlation effect of  $\text{Ni}^{3+}$ , the use of  $U = 4.0$  eV is the only option (see our previous work<sup>1</sup> and a comparison of  $\text{Ni}^{3+}$  spin densities calculated by using  $U = 4.0$  and  $6.4$  eV in Table S1 below).

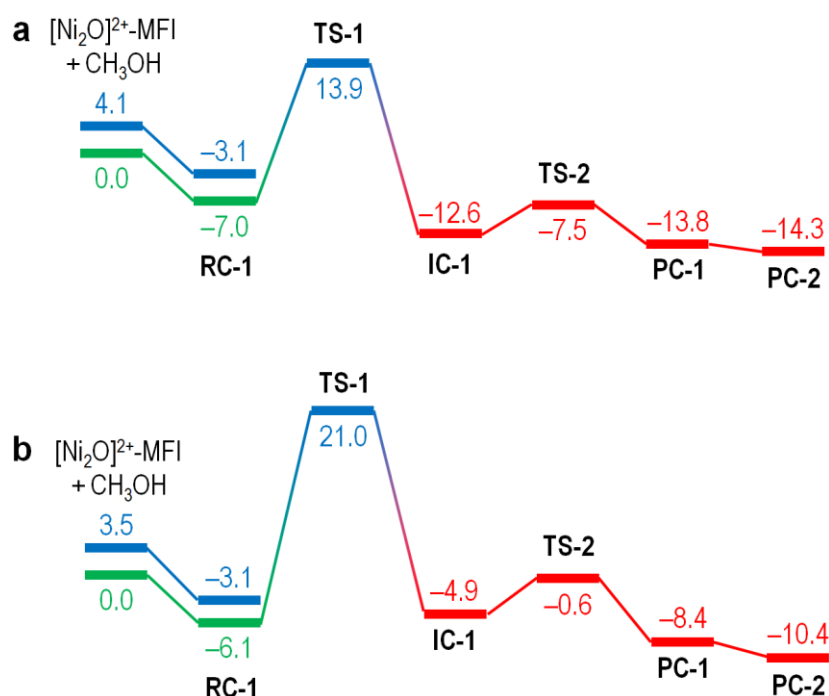

**Figure S1.** Energy diagrams (in kcal/mol) of the  $\text{CH}_3\text{OH}$  oxidation to  $\text{CH}_2\text{O}$  via the C–H pathway over the  $[\text{Cu-O-Cu}]^{2+}$  active site calculated by using (a)  $U = 4.0$  eV and (b)  $U = 6.4$  eV. Blue, red, and green lines correspond to the quintet, triplet, and open-shell singlet states, respectively.

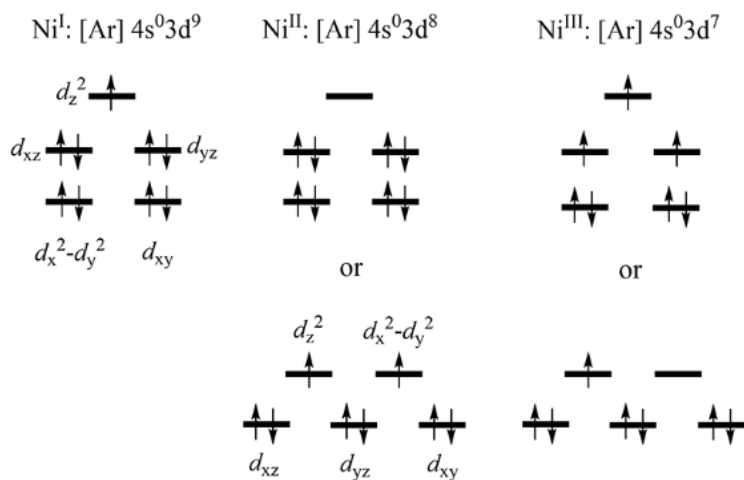

**Scheme S1.** Possible configurations of the outermost electrons in  $\text{Ni}^+$ ,  $\text{Ni}^{2+}$ , and  $\text{Ni}^{3+}$  cations, leading to the formation of doublet, singlet or triplet, and quartet or doublet, respectively.

**Table S1.** Spin density of Ni centers indicating the number of unpaired electrons in the outer shell.

| $U$ (eV) | Reaction step | Spin state | $\rho(\text{Ni1}, \text{Ni2})$ |
|----------|---------------|------------|--------------------------------|
| 4.0      | RC-1          | OSS        | 1.60, -1.60                    |
|          | TS-1          | Quintet    | 1.45, 1.44                     |
|          | IC-1          | Triplet    | 1.09, 1.00                     |
|          | TS-2          | Triplet    | 1.07, 1.00                     |
|          | PC-1          | Triplet    | 1.03, 0.96                     |
|          | PC-2          | Triplet    | 1.05, 1.05                     |
| 6.4      | RC-1          | OSS        | 1.70, -1.70                    |
|          | TS-1          | Quintet    | 1.54, 1.46                     |
|          | IC-1          | Triplet    | 1.30, 0.98                     |
|          | TS-2          | Triplet    | 1.24, .098                     |
|          | PC-1          | Triplet    | 1.08, 0.97                     |
|          | PC-2          | Triplet    | 1.02, 1.02                     |

**IC-1** involves  $\text{Ni}^{3+}$  and  $\text{Ni}^+$ , each of which is expected to have spin density (number of unpaired electrons) of one. This can be correctly treated only when  $U = 4.0$  eV is used. When  $U = 6.4$  eV is used, however, one of the Ni centers has a spin density of 1.30, which is incorrect for  $\text{Ni}^{3+}$ .

**Section S2.** Computational methods for calculating reaction rate constants

For performing the kinetic simulations to calculate reaction rate constants, we use the transition state theory-based Arrhenius equation, as follow.

$$k_{for} = \frac{k_B T}{h} \frac{Z^\ddagger}{Z} \exp\left(-\frac{E_a}{RT}\right) \approx \frac{k_B T}{h} \exp\left(-\frac{E_a}{RT}\right)$$

where  $E_a$  is the activation barrier,  $k_B$  is the Boltzmann constant,  $h$  is the Planck constant,  $R$  is the universal gas constant, and  $T$  is the varying reaction temperature. We previously found that the partition function ratio ( $Z^\ddagger/Z$ ) for surface-bound reactions is approximately close to unity.<sup>2</sup>

**Table S2.** Geometrical parameters along the hydrolysis of CH<sub>3</sub> ligand to CH<sub>3</sub>OH over partially reduced Cu-ZSM-5 in the closed-shell singlet state.

| Reaction step | $d_{\text{C-OF}} (\text{\AA})$ | $d_{\text{C-Cu1}} (\text{\AA})$ | $d_{\text{C-Ow}} (\text{\AA})$ | $d_{\text{H-Ow}} (\text{\AA})$ | $d_{\text{H-Oa}} (\text{\AA})$ | $d_{\text{Cu-Ow}} (\text{\AA})$ | $d_{\text{Cu-Oa}} (\text{\AA})$ |
|---------------|--------------------------------|---------------------------------|--------------------------------|--------------------------------|--------------------------------|---------------------------------|---------------------------------|
| RC-1          | 1.51                           | 3.25                            | 3.35                           | 0.99                           | 1.80                           | 3.59, 4.10                      | 1.87, 1.90                      |
| TS-1          | 1.49                           | 3.24                            | 3.44                           | 1.02                           | 1.62                           | 2.06, 3.25                      | 2.30, 1.84                      |
| IC-1          | 1.49                           | 3.32                            | 4.04                           | 1.43                           | 1.07                           | 1.84                            | 1.89                            |
| TS-2          | 2.15                           | 2.60                            | 3.57                           | 2.58                           | 0.98                           | 1.84, 1.94                      | 2.35                            |
| IC-2          | 3.09                           | 1.96                            | 2.79                           | 3.43                           | 0.98                           | 1.82, 1.91                      | 2.10                            |
| TS-3          | 3.52                           | 2.27                            | 2.03                           | 3.27                           | 0.98                           | 1.85, 2.02                      | 2.10                            |
| PC-1          | 4.44                           | 2.96                            | 1.47                           | 3.30                           | 0.98                           | 1.91                            | 1.94                            |

O<sub>w</sub> and O<sub>a</sub> denote the O atom of the H<sub>2</sub>O and Cu–O–Cu, respectively.

**Table S3.** Geometrical parameters along the oxidation of CH<sub>3</sub> ligand to C<sub>2</sub>H<sub>6</sub>O over partially reduced Cu-ZSM-5 in the closed-shell singlet state.

| Reaction step | $d_{\text{C-OF}} (\text{\AA})$ | $d_{\text{C1-O}_m} (\text{\AA})$ | $d_{\text{H-O}_m} (\text{\AA})$ | $d_{\text{H-O}_a} (\text{\AA})$ | $d_{\text{Cu-O}_m} (\text{\AA})$ | $d_{\text{Cu-O}_a} (\text{\AA})$ |
|---------------|--------------------------------|----------------------------------|---------------------------------|---------------------------------|----------------------------------|----------------------------------|
| RC-2          | 1.50                           | 3.19                             | 0.98                            | 1.93                            | 2.95, 3.94                       | 1.88, 1.90                       |
| TS-4          | 1.50                           | 3.30                             | 1.03                            | 1.55                            | 2.02, 3.43                       | 2.40, 1.84                       |
| IC-3          | 1.50                           | 3.29                             | 1.44                            | 1.07                            | 1.85                             | 1.92                             |
| TS-5          | 2.13                           | 2.96                             | 1.42                            | 1.07                            | 1.85                             | 1.90                             |
| PC-2          | 3.54                           | 1.46                             | 2.53                            | 0.98                            | 1.94                             | 1.96                             |

O<sub>m</sub> and O<sub>a</sub> denote the O atom of the CH<sub>3</sub>OH and Cu–O–Cu, respectively. C1 denotes the C atom of the CH<sub>3</sub>OF.

**Table S4.** Geometrical parameters and atomic spin densities ( $\rho$ ) along the C–H pathway of CH<sub>3</sub>OH oxidation to CH<sub>2</sub>O on fully reduced Cu–O<sub>2</sub>–Cu and Ni–O<sub>2</sub>–Ni active sites.

| Catalyst | Reaction step | Ground state <sup>a</sup> | $d_{M-C}$ (Å) | $d_{M-O}$ (Å) | $d_{C-H}$ (Å) | $d_{\mu O-H}$ | $d_{O-H}$ (Å) | $d_{C-O}$ (Å) | $\rho(M1, M2)$ | $\rho(\mu O, O, C)$ |
|----------|---------------|---------------------------|---------------|---------------|---------------|---------------|---------------|---------------|----------------|---------------------|
| Cu-ZSM-5 | RC-1          | Triplet                   | 3.92          | 3.66          | 1.10          | -             | 0.97          | 1.43          | 0.51, 0.51     | 0.72, 0.06, 0.00    |
|          | TS-1          | Triplet                   | 3.27          | 3.95          | 1.31          | 1.29          | 0.98          | 1.38          | 0.40, 0.38     | 0.48, 0.20, 0.31    |
|          | IC-1          | CSS                       | 2.07          | 2.85          | 2.73          | 0.97          | 0.98          | 1.34          | 0.00, 0.00     | 0.00, 0.00, 0.00    |
|          | TS-2          | CSS                       | 2.10          | 2.56          | -             | 0.98          | 1.54          | 1.26          | 0.00, 0.00     | 0.00, 0.00, 0.00    |
|          | PC-1          | CSS                       | 1.99          | 1.87          | -             | 0.99          | 1.76          | 1.30          | 0.00, 0.00     | 0.00, 0.00, 0.00    |
|          | PC-2          | CSS                       | -             | 1.92          | -             | 0.99          | 3.41          | 1.26          | 0.00, 0.00     | 0.00, 0.00, 0.00    |
| Ni-ZSM-5 | RC-1          | OSS                       | 4.12          | 4.19          | 1.10          | -             | 0.97          | 1.43          | 1.60, -1.60    | 0.00, 0.00, 0.00    |
|          | TS-1          | Quintet                   | 3.40          | 4.07          | 1.39          | 1.19          | 0.97          | 1.38          | 1.45, 1.44     | 0.33, 0.19, 0.36    |
|          | IC-1          | OSS                       | 1.99          | 2.76          | 2.72          | 0.97          | 0.98          | 1.36          | 1.17, -1.08    | 0.00, -0.04, -0.06  |
|          | TS-2          | Triplet                   | 1.97          | 2.10          | -             | 0.98          | 1.15          | 1.32          | 1.07, 1.00     | 0.04, -0.07, -0.13  |
|          | PC-1          | Triplet                   | 1.98          | 1.90          | -             | 0.99          | 1.78          | 1.30          | 1.03, 0.96     | 0.01, -0.02, -0.08  |
|          | PC-2          | Triplet                   | -             | 1.98          | -             | 0.99          | 3.05          | 1.27          | 1.05, 1.05     | 0.03, 0.00, -0.02   |

<sup>a</sup> CSS and OSS stand for closed-shell and open-shell singlet states, respectively.



**Table S5.** Geometrical parameters and atomic spin densities ( $\rho$ ) along the (O–H)<sub>a</sub> pathway of CH<sub>3</sub>OH oxidation to CH<sub>2</sub>O on fully reduced Cu–O<sub>2</sub>–Cu and Ni–O<sub>2</sub>–Ni active sites.

| Catalyst | Reaction step | Ground state <sup>a</sup> | $d_{M-C}$ (Å) | $d_{M-O}$ (Å) | $d_{C-H}$ (Å) | $d_{\mu O-H}$ | $d_{O-H}$ (Å) | $d_{C-O}$ (Å) | $\rho(M1, M2)$ | $\rho(\mu O, O, C)$ |
|----------|---------------|---------------------------|---------------|---------------|---------------|---------------|---------------|---------------|----------------|---------------------|
| Cu-ZSM-5 | RC-2          | Triplet                   | 3.80          | 2.90, 2.66    | 1.10          | -             | 0.97          | 1.45          | 0.53, 0.54     | 0.72, 0.03, 0.00    |
|          | TS-3          | Triplet                   | 3.25          | 2.07, 2.26    | 1.10          | 1.38          | 1.13          | 1.44          | 0.54, 0.54     | 0.50, 0.15, 0.01    |
|          | IC-2          | Triplet                   | 3.00          | 1.96, 1.96    | 1.10          | 0.98          | -             | 1.43          | 0.56, 0.56     | 0.26, 0.31, 0.01    |
|          | TS-4          | CSS                       | 2.77          | 2.00, 2.04    | 1.36          | 0.98, 1.31    | -             | 1.36          | 0.00, 0.00     | 0.00, 0.00, 0.00    |
|          | PC-2          | CSS                       | -             | 1.92          | -             | 0.99, 0.99    | -             | 1.26          | 0.00, 0.00     | 0.00, 0.00, 0.00    |
| Ni-ZSM-5 | RC-2          | OSS                       | 3.40          | 2.30, 2.26    | 1.10          | -             | 0.98          | 1.47          | 1.65, -1.65    | 0.01, -0.01, 0.00   |
|          | TS-3          | OSS                       | 3.43          | 2.23, 2.10    | 1.10          | 1.39          | 1.13          | 1.44          | 1.653 -1.63    | 0.01, -0.01, 0.00   |
|          | IC-2          | Quintet                   | 2.90          | 1.96, 1.96    | 1.10          | 0.97          | -             | 1.44          | 1.72, 1.72     | 0.00, 0.18, 0.01    |
|          | TS-4          | Quintet                   | 2.72          | 2.00, 2.00    | 1.43          | 0.98, 1.24    | -             | 1.37          | 1.43, 1.43     | 0.21, 0.31, 0.34    |
|          | PC-2          | Triplet                   | -             | 1.98          | -             | 0.99, 0.99    | 3.05          | 1.27          | 1.05, 1.05     | 0.03, 0.00, -0.02   |

<sup>a</sup> CSS and OSS stand for closed-shell and open-shell singlet states, respectively.

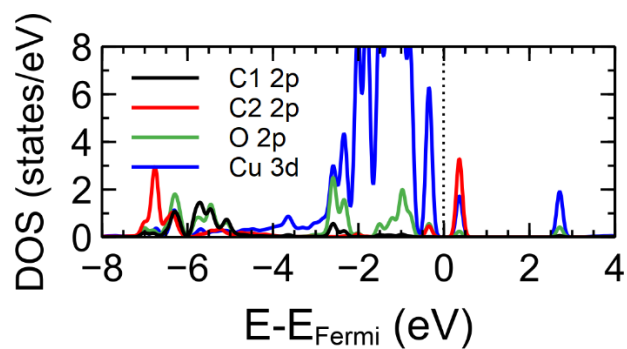

**Figure S2.** Projected Density of States (PDOS) of TS-5 in the  $\text{CH}_3$  oxidation to  $\text{C}_2\text{H}_6\text{O}$  on reduced Cu active site.

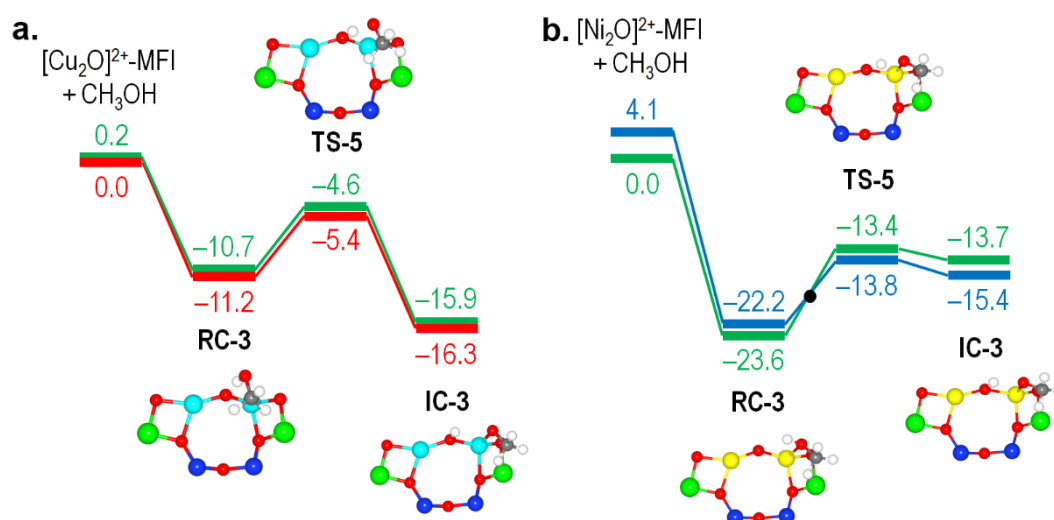

**Figure S3.** Energy diagrams (in kcal/mol) of  $\text{CH}_3\text{OH}$  oxidation to  $\text{CH}_2\text{O}$  via the  $(\text{O}-\text{H})_b$  pathway over (a)  $[\text{Cu}-\text{O}-\text{Cu}]^{2+}$  and (b)  $[\text{Ni}-\text{O}-\text{Ni}]^{2+}$  active sites in the quintet (blue lines), triplet (red lines), and singlet (green lines) states.

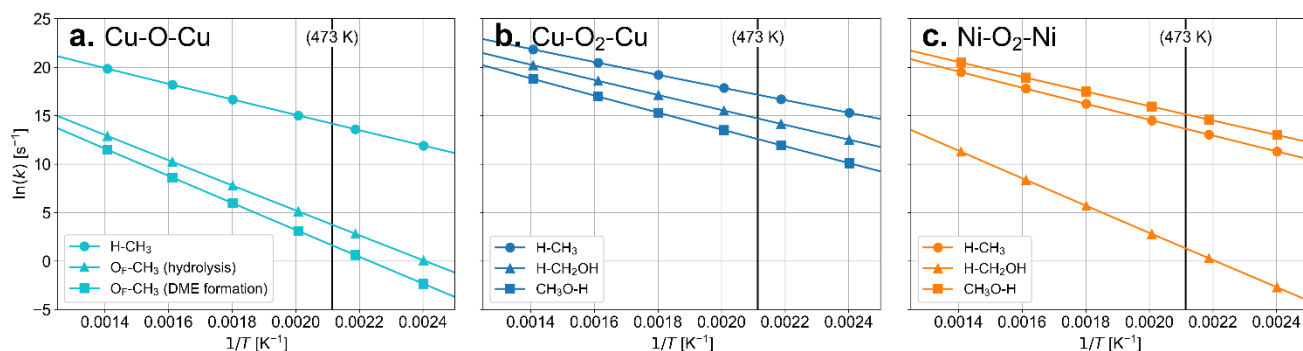

**Figure S4.** Simulated Arrhenius plots for the rate-determining  $H-CH_3$ ,  $O_F-CH_3$ ,  $H-CH_2OH$ , and  $CH_3O-H$  activation steps over the (a)  $mono(\mu-O)Cu_2$ , (b)  $bis(\mu-O)Cu_2$ , and (c)  $bis(\mu-O)Ni_2$  active sites.

As shown in Figure S4a, the  $mono(\mu-O)Cu_2$  species activates  $CH_4$  at 473 K with a high reaction rate (about  $14 s^{-1}$ ), which is ten order of magnitude higher than the formation of  $CH_3OH$  via the hydrolysis reaction and  $C_2H_6O$  via the dissociative pathway, suggesting that the activated  $CH_4$  (i.e., the surface  $CH_3$ ) would remain on the zeolite framework and the products ( $CH_3OH$  or  $C_2H_6O$ ) would not come out if there is no solvent ( $H_2O$  or  $CH_3OH$ ) added to the reactor. This, in fact, is consistent with the experimental observations.<sup>3,4</sup>

In Figure S4b, we show that the  $bis(\mu-O)Cu_2$  active site, in term of activity toward  $CH_4$ , is more superior than the  $mono(\mu-O)Cu_2$  active site. This superiority, however, comes with a trade-off for being easy and rapid to over-oxidize the formed  $CH_3OH$ , as indicated by the similarity in the reaction rates for the  $H-CH_3$  and  $H-CH_2OH$  activation steps at all temperature. This result is actually anticipated to some extent since the reduced  $Cu-O-Cu$  species is also highly active toward the  $CH_4$  oxidation.

For the  $bis(\mu-O)Ni_2$  active site (Figure S4c), on the other hand, we found a good balance between activities toward  $CH_4$  and  $CH_3OH$ . More specifically, the  $H-CH_3$  activation rate is found to be as high as that in the  $mono(\mu-O)Cu_2$  case with a very low  $H-CH_2OH$  activation rate, suggesting that the easily desorbed  $CH_3OH$  can be protected from the overoxidation to  $CH_2O$ .

## References

1. Mahyuddin, M. H.; Yoshizawa, K. DFT Exploration of Active Site Motifs in Methane Hydroxylation by Ni-ZSM-5 Zeolite. *Catal. Sci. Technol.* **2018**, *8*, 5875–5885.
2. Saputro, A. G.; Putra, R. I. D.; Maulana, A. L.; Karami, M. U.; Pradana, M. R.; Agusta, M. K.; Dipojono, H. K.; Kasai, H. Theoretical Study of CO<sub>2</sub> Hydrogenation to Methanol on Isolated Small Pd<sub>x</sub> Clusters. *J. Energy Chem.* 2019, *35*, 79–87.
3. Groothaert, M. H.; Smeets, P. J.; Sels, B. F.; Jacobs, P. A.; Schoonheydt, R. A. Selective Oxidation of Methane by the Bis( $\mu$ -Oxo)dicopper Core Stabilized on ZSM-5 and Mordenite Zeolites. *J. Am. Chem. Soc.* **2005**, *127*, 1394–1395.
4. Wulfers, M. J.; Lobo, R. F.; Ipek, B.; Teketel, S. Conversion of Methane to Methanol on Copper-Containing Small-Pore Zeolites and Zeotypes. *Chem. Commun.* **2015**, *51*, 4447–4450.
